# Supplementary material
Source: PubMed Central journal article supplement (PMC2719486)
Supplement: NIHMS84227-supplement-1.pdf [file NIHMS84227-supplement-1.pdf]

## SUPPLEMENTARY MATERIAL

TITLE: Recognition of atypical 5' splice sites by shifted base-pairing to U1 snRNA

AUTHORS: Xavier Roca and Adrian R. Krainer

## SUPPLEMENTARY FIGURES

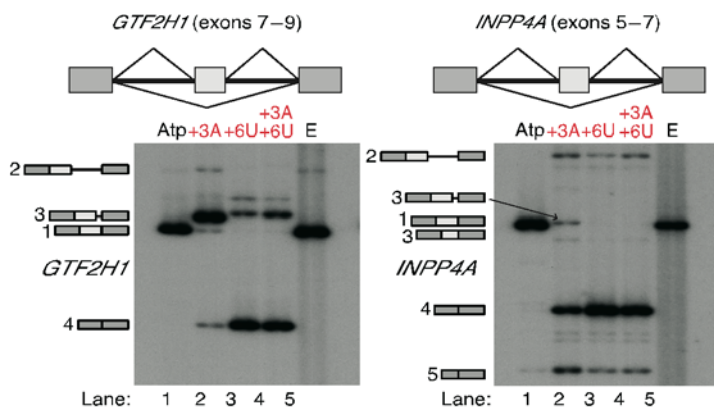

**Supplementary Figure 1 Detection of endogenous and transfected *GTF2H1* and *INPP4A* mRNAs.** cDNAs from HeLa cells transfected with the various minigenes (lanes 1-4) or mock-transfected (lane 5) were amplified using primers located in the exons flanking the exon containing the atypical 5' ss. The RT-PCR products from the mock-transfected samples correspond to the endogenous *GTF2H1* and *INPP4A* transcripts (E, lane 5), confirming the efficient use of the atypical 5' ss. A small amount of intron 8 retention was seen for endogenous *GTF2H1* (left panel, lane 5). Although the primers can amplify the transcripts from both transfected and endogenous genes, in transiently transfected cells the RT-PCR products are derived mostly from the minigenes, which are expressed at higher levels. In the mock-transfected samples (E, lane 5), ~ 50-fold more total cDNA template was added to the reaction. The identity of the RT-PCR products, schematically depicted on

the left of each panel, is described in the **Fig. 1** legend. For the *GTF2H1* minigene, the mutations at the exon 8 5' splice site activated cryptic 5' splice sites at positions +20 (GAG/GUGCAG) and +25 (GCA/GUAACU) in intron 8 (band #3). For the *INPP4A* minigene, the analogous mutations activated a cryptic 5' splice site 31 nucleotides upstream of the 5' splice site in exon 6 (CGU/GUAUGA), and to a small extent another cryptic 5' splice site at position +176 (AGG/GUAAGA) in intron 6. The arrow indicates a cryptic 5' splice site at position +5 (AAA/GUAAUG) of *INPP4A* intron 6 that was activated only in the context of the +3A mutation. In addition, band #5 in *INPP4A* corresponds to an mRNA species generated by skipping of exon 6 and use of a cryptic 5' splice site (GCG/GUGAGU) 63 nucleotides upstream of the 5' splice site of exon 5.

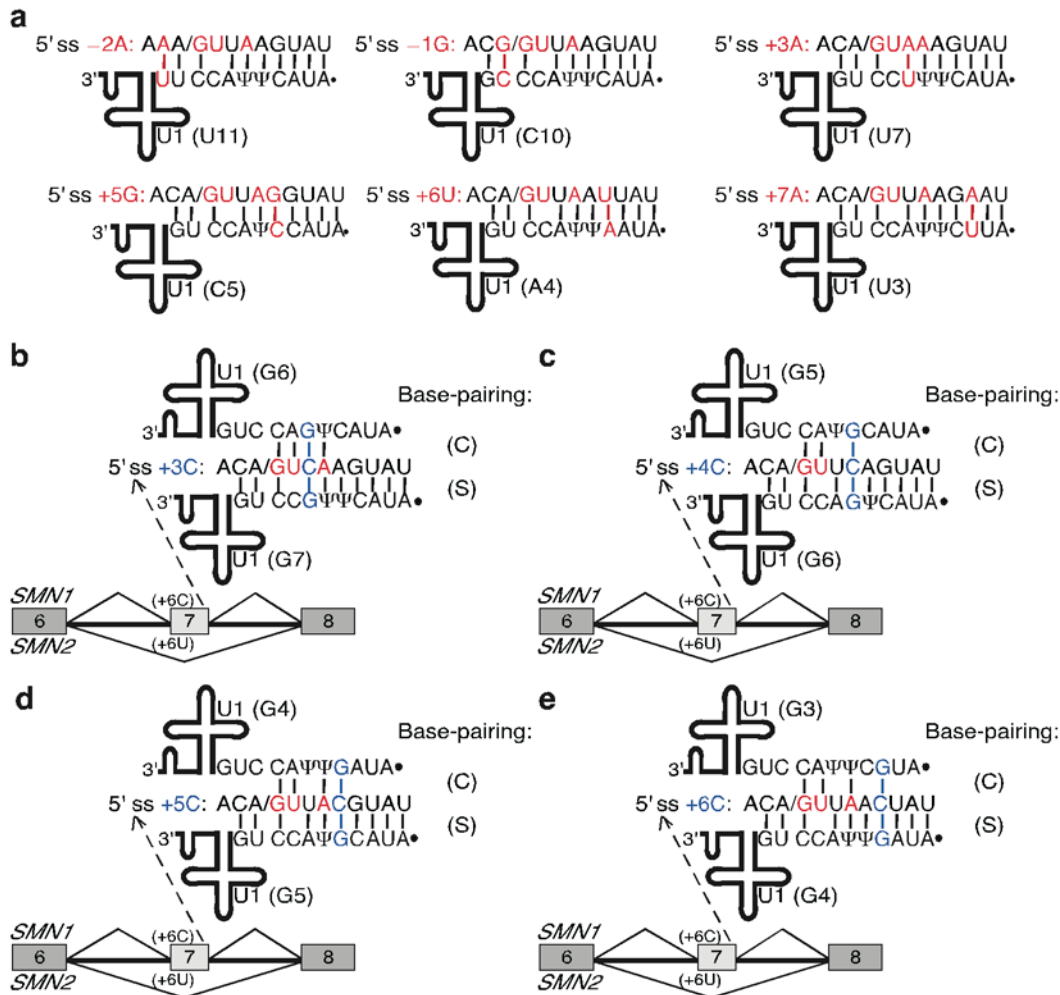

**Supplementary Figure 2 Schematic of the base-pairing profiles for the mutant 5' ss used in Figs. 2 and 3.** **a**, Base-pairing profiles of mutants  $-2A$ ,  $-1G$ ,  $+3A$ ,  $+5G$ ,  $+6U$  and  $+7A$  with their corresponding suppressor U1 snRNAs restoring base-pairing in the shifted register (**Fig. 2**). Mutations at the 5' ss or U1 are highlighted in red. For these mutant 5' ss, there is no suppressor U1 in the canonical register, because the mutant nucleotide already base-pairs to endogenous U1 in the canonical register. **b-e**, Diagrams show the atypical 5' ss carrying the  $+3C$  (**b**),  $+4C$  (**c**),  $+5C$  (**d**) and  $+6C$  (**e**) mutations, along with the corresponding suppressor U1 snRNAs in the canonical (C) or shifted (S) base-pairing registers (**Fig. 3**). The 5' ss mutations and the compensatory U1 mutations are highlighted in blue. Note that some of the suppressor U1 snRNAs were used for more than one 5' ss

mutation: U1 (G5) compensates for 5' ss mutation +4C in the canonical register, and for mutation +5C in the shifted register. **Fig. 3** shows that U1 (G5) rescued exon 7 inclusion for mutant +5C but not for +4C, and that U1 (G6) rescued mutation +4C (shifted register) but not +3C (canonical register). These results indicate that the distinct effects of the suppressor U1s are not due to their relative expression levels, and further strengthen the demonstration of shifted base-pairing between the atypical 5' ss and U1.

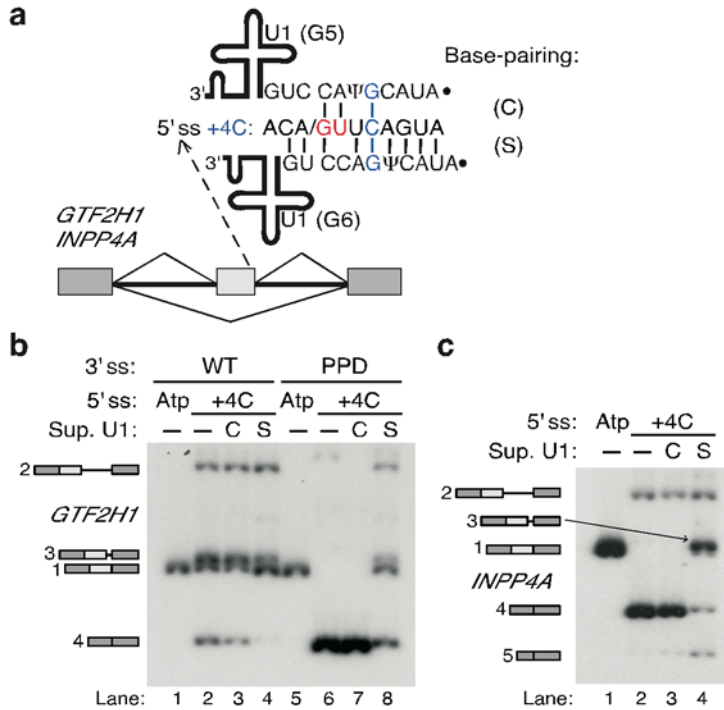

**Supplementary Figure 3 Suppressor U1 snRNA analysis for atypical 5' ss in their natural context.** **a**, Base-pairing profiles of the +4C mutant 5' ss in the *INPP4A* and *GTF2H1* minigenes with the corresponding suppressor U1 snRNAs carrying compensatory mutations in the canonical (C) or shifted (S) registers. Mutant nucleotides and compensatory U1 mutations are highlighted in blue. **b**, Suppressor U1 analysis of the +4C mutant 5' ss in the *GTF2H1* minigene. The top labels indicate the version of the 3' ss upstream exon 8, the version of the atypical 5' ss, and the mock or suppressor U1 snRNA used. In lanes 5-8, the 3' ss upstream of exon 8 was weakened by a point mutation at the polypyrimidine tract ('polypyrimidine tract down mutation' or PPD), so as to compromise exon 8 inclusion. Suppressor U1 in the shifted but not in the canonical register rescued exon 8 inclusion in both the wild-type and the PPD minigenes (lanes 2-4, 6-8). **c**, Suppressor U1 analysis in the *INPP4A* minigene. Whereas the suppressor U1 in the canonical register did not rescue exon 6 inclusion (lane 3), the suppressor in the shifted register did, albeit weakly (lane 4).

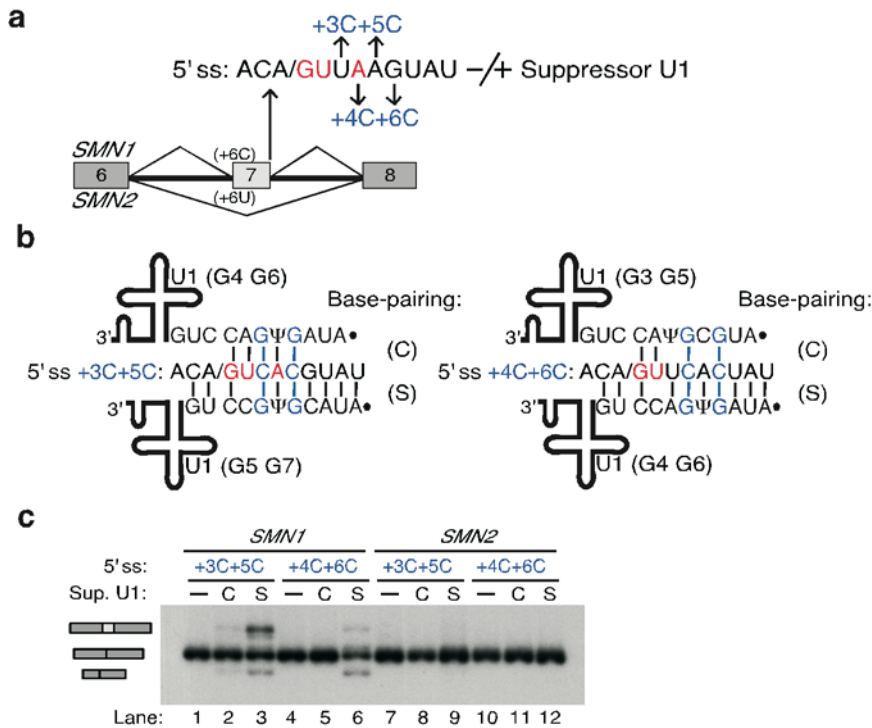

**Supplementary Figure 4 Analysis of double mutations at atypical 5' ss.** **a**, Schematic of the +3C+5C and +4C+6C 5' ss mutations in the *SMN1/2* context. Mutant nucleotides are shown in blue. **b**, Base-pairing profiles of the two double-mutant 5' ss with the corresponding suppressor U1 snRNAs carrying compensatory mutations in the canonical (C) or shifted (S) registers. Compensatory U1 mutations are indicated and highlighted in blue. **c**, Analysis of the mutant 5' ss. The top labels indicate the minigene (*SMN1* or 2), the mutant 5' ss in exon 7, and the mock or suppressor U1 snRNA used. In this case, the suppressor U1 snRNAs rescued exon 7 inclusion only in the *SMN1* context (lanes 1-6). For +3C+5C (lanes 1-3), both suppressors rescued splicing, but the suppressor U1 (G5 G7) in the shifted register was more effective. For +4C+6C (lanes 4-6), only U1 (G4 G6) in the shifted register had an effect. In this experiment, aberrant splicing products were also seen upon use of suppressor U1s, for unknown reasons.

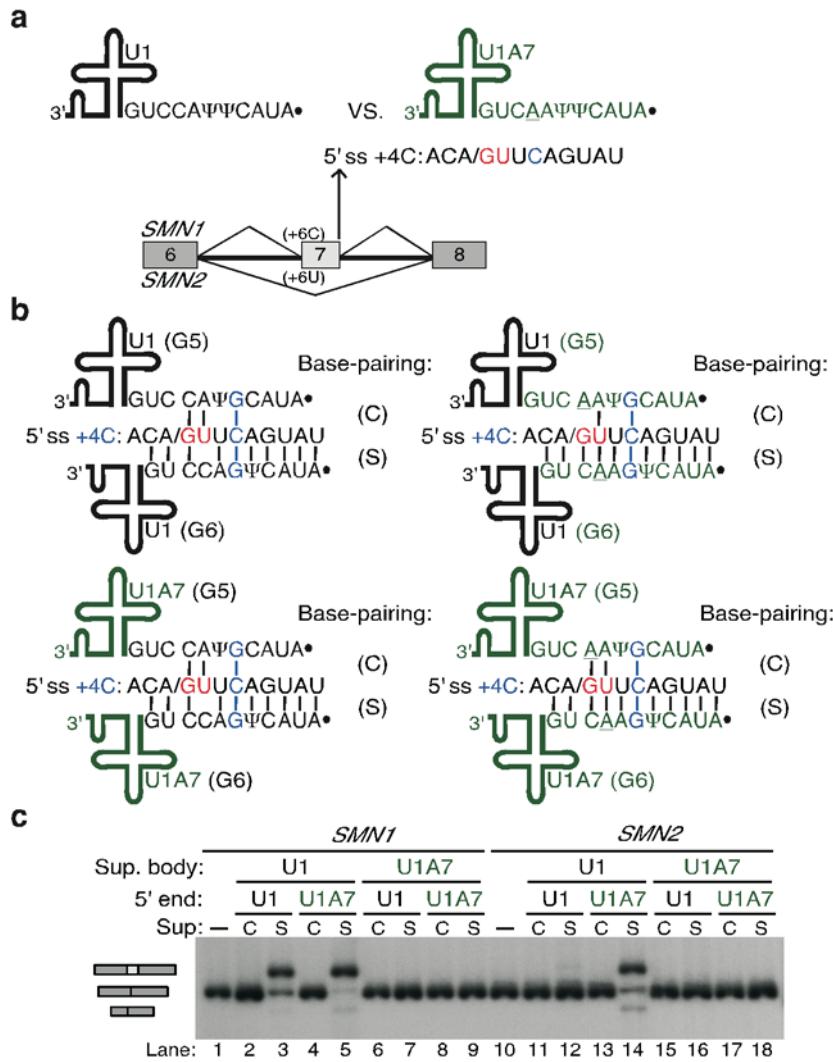

**Supplementary Figure 5 Use of U1 and U1A7 snRNA suppressors to rescue splicing via mutant atypical 5' ss. a**, Schematic of the U1 (black) and U1A7 (green) snRNAs and the mutant atypical (+4C) 5' ss in the *SMN1/2* context. U1 and U1A7 differ by one nucleotide at their 11-nucleotide 5' ends (underlined in U1A7), and have several additional nucleotide differences in the snRNA body. **b**, Base-pairing of the four different combinations of suppressor U1/U1A7: the U1 snRNA body with the U1 snRNA 5' end; the U1 body with the U1A7 5' end; the U1A7 body with the U1 5' end; and the U1A7 body with its 5' end. For each combination, the compensatory mutation was introduced in the canonical (G5, (C)) or shifted (G6, (S)) register, indicated in blue. **c**, Analysis of the

+4C mutant 5' ss with U1/U1A7 suppressors. The top label indicates the minigene (*SMN1* or 2), the suppressor body (U1 or U1A7), the 5' end (U1 or U1A7), and the compensatory mutation (control (-), C or S). None of the suppressors with the U1A7 body rescued exon 7 inclusion, but both 5' ends of U1 and U1A7 in the U1 body did.



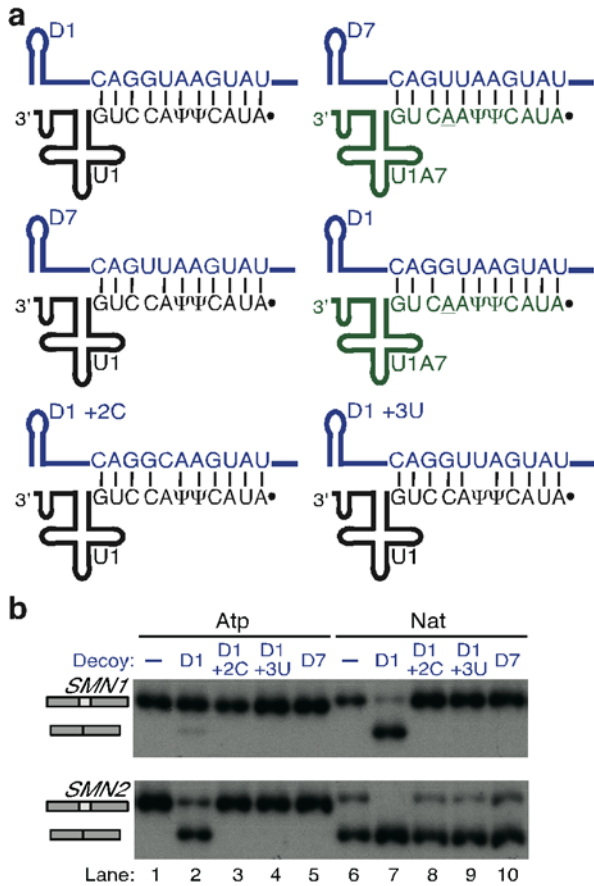

**Supplementary Figure 6 Specificity of the U1/U1A7 snRNA decoys.** **a**, Base-pairing profiles of the different decoys used with the 5' end of U1/U1A7. The D1 and D7 decoys have perfect (11 bp) complementarity to their cognate snRNAs (top diagrams). In addition, the D1 decoy has one mismatch (10 bp) to the U1A7 snRNA in the canonical register, and the D7 decoy has one less potential base pair (10 bp) to U1 in the shifted register (middle diagrams). To assess the specificity of the D1 and D7 decoys, two additional decoys were constructed, D1+2C and D1+3U, which can have the same number of base pairs (10 bp) with U1 as the D7 decoy (bottom diagrams). **b**, Decoys need perfect complementarity (11 bp) to their cognate snRNA to have a strong effect. The top label indicates the 5' ss in *SMN1/2* exon 7 and the decoy used. As in b, expression of the D1 decoy resulted in exon 7 skipping. In contrast, the D1+2C, D1+3U and D7 decoys, which have one nucleotide

mismatch (10 bp) when base-pairing with U1, did not affect recognition of the natural or the atypical 5' ss. These results indicate that the snRNA decoys need perfect complementarity to their cognate snRNA, and explain why the D7 decoy does not significantly affect exon 7 inclusion.

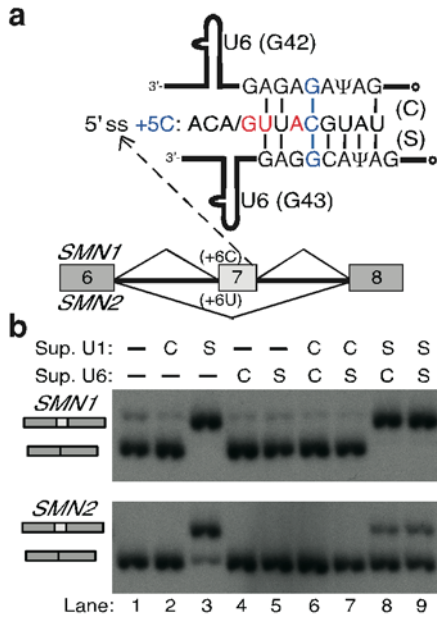

**Supplementary Figure 7 U6 snRNA does not base-pair to atypical 5' ss in a shifted register.** **a**, Schematic of the suppressor U6 experiment. In this case, the suppressor U6 snRNAs carry only a point mutation to compensate for the +5C mutation in the atypical 5' ss. The U6 G42 and G43 mutations rescue base-pairing to the +5C 5' ss in the canonical (C) or shifted (S) register, respectively. Note that the G43 suppressor U6 has much stronger predicted base-pairing to the mutant 5' ss than the G42 suppressor. **b**, RT-PCR analysis of co-transfections of the *SMN1/2* constructs carrying +5C 5' ss and the various suppressor U1 and U6 snRNAs. The suppressor U1s (C or S) used are shown in **Supplementary Fig. 2d** online. As in **Fig. 3**, the suppressor U6s alone did not show any effect on exon 7 inclusion. Combined with suppressor U1, none of the suppressor U6 enhanced the levels of exon 7 inclusion.

## SUPPLEMENTARY TABLES

|                                       | <i>H. sapiens</i> | <i>M. musculus</i> | <i>D. melanogaster</i> | <i>C. elegans</i> | <i>A. thaliana</i> |
|---------------------------------------|-------------------|--------------------|------------------------|-------------------|--------------------|
| Search                                |                   |                    |                        |                   |                    |
| NNHGTYRAGT <sup>i</sup>               | 40                | 35                 | 10                     | 11                | 55                 |
| NYGGTYRAGT                            | 7                 | 5                  | 3                      | 4                 | 17                 |
| NYAGTRRAGT                            | 4                 | 5                  | 0                      | 3                 | 5                  |
| NYAGTYYYAGT                           | 1                 | 2                  | 1                      | 1                 | 7                  |
| NYAGTYRBGT                            | 1                 | 3                  | 2                      | 14                | 4                  |
| NYAGTYRAHT                            | 1                 | 1                  | 2                      | 23                | 9                  |
| NYAGTYRAGV                            | 4                 | 5                  | 2                      | 7                 | 18                 |
| Homology <sup>ii</sup>                | 1                 | 3                  |                        |                   |                    |
| Total                                 | 59                | 59                 | 20                     | 63                | 115                |
| Human-mouse orthologous 5' ss         |                   |                    |                        |                   |                    |
| Conserved                             | 27                | 27                 |                        |                   |                    |
| Not conserved                         | 13                | 8                  |                        |                   |                    |
| Intron not in ortholog <sup>iii</sup> | 1                 | 7                  |                        |                   |                    |
| No ortholog <sup>iv</sup>             | 10                | 0                  |                        |                   |                    |
| Not in databases <sup>v</sup>         | 8                 | 17                 |                        |                   |                    |
| Total                                 | 59                | 59                 |                        |                   |                    |

**Supplementary Table 1 Summary of the in silico searches for atypical 5' ss.** <sup>i</sup>See Methods for details about the SpliceRack<sup>1</sup> searches. <sup>ii</sup>Number of 5' ss that were added based on homology to the gene from the other mammalian species. <sup>iii</sup>The other mammalian counterpart does not have an intron mapped at the same location. <sup>iv</sup>Genes for which we were not able to find an ortholog in the other mammalian species. <sup>v</sup>Genes that we were unable to find in the ENSEMBL or UCSC genome resources, and that correspond to putative genes awaiting confirmation. See Supplementary Table 3 for a complete list of atypical 5' ss in all five species.

| HUMAN     |           | <i>Homo sapiens</i>  |             |          |                                        |                                                     |                                        |  |  |
|-----------|-----------|----------------------|-------------|----------|----------------------------------------|-----------------------------------------------------|----------------------------------------|--|--|
| Search    |           | NNHGYRAGT            | 40          |          |                                        |                                                     |                                        |  |  |
| Accession | Gene Name | Int. #               | Int. Length | Sequence | Orthologs                              | Ortholog sequence                                   |                                        |  |  |
| H1        | NM_006314 | <i>CNKSR1</i>        | 15          | 170      | AAGAAATAgtaaagctctgggtgctgctggggg      | M32                                                 |                                        |  |  |
| H2        | NM_006252 | <i>PRKAA2</i>        | 1           | 28900    | AGTGAAAGgttgagtagcgcctccgaccctgtgctgg  | NO, XM_131633                                       | AGTGAAGAgtagtgcagcggcggcgggcgggcag     |  |  |
| H3        | NM_024911 | <i>GPR177</i>        | 2           | 34708    | CCAAATCAgtaagtgtaactcctctcatcctctct    | NO, NM_026582                                       | CCAAATCAgtaagtagcccaactgctatgctcaactct |  |  |
| H4        | NM_015485 | <i>RWDD3</i>         | 2           | 1827     | AGTTAAATgttgagtagaatctgctatttctgctt    | NO, NM_028456                                       | ACATCAAGgtgctgaaactcttttgaatgaat       |  |  |
| H5        | NM_006135 | <i>CAPZA1</i>        | 4           | 4351     | TCTGTACTgttaagtatctgactgctctatcatgag   | M15                                                 |                                        |  |  |
| H6        | NM_012134 | <i>LMOD1</i>         | 2           | 840      | CTCAAGAAgtaagtagttgtggcatgagcaacagg    | NO, NM_053106                                       | TGAAGAAAgtaaaaggtggcagcgaggctaggggct   |  |  |
| H7        | NM_025145 | <i>C10orf79</i>      | 17          | 2434     | AACACACAgttgagttcctatgactagcttctgctc   | Intron not in mouse ortholog, <i>D19Erid652e</i>    |                                        |  |  |
| H8        | NM_198795 | <i>TDRD1</i>         | 25          | 3361     | GTAAAAAgttaagtaagtaaaactgatgtttcc      | NO, NM_031387                                       | GAAGCTAAgtaagttcccgtttccctctgtgatgc    |  |  |
| H9        | NM_005316 | <i>GTF2H1</i>        | 8           | 117      | AGAAAAACgttaagataaagtcagaggtgcagtaact  | M19                                                 |                                        |  |  |
| H10       | NM_033150 | <i>COL2A1</i>        | 22          | 371      | GAGAAAGAgtaagtgaaatgggagctccatccatg    | NO, NM_031163                                       | GAGAGAGAgtaagtagcaagagctccagctcacagg   |  |  |
| H11       | NM_020818 | <i>KIAA1409</i>      | 26          | 9379     | CAAAATTCgttgagtagctctctcatctccctgaa    | M27                                                 |                                        |  |  |
| H12       | NM_173805 | <i>FLJ38723</i>      | 6           | 479      | CAGGCCAgttgagtagctctccctggggaagg       | NO ORTHOLOG                                         |                                        |  |  |
| H13       | NM_198830 | <i>ACLY</i>          | 5           | 442      | AAGAAAGAgttgagtagagaggacgtagggaggtgc   | M5                                                  |                                        |  |  |
| H14       | NM_002265 | <i>KPNB1</i>         | 19          | 1607     | CGTACACgttgagtagatacaaccagttccctctg    | M4                                                  |                                        |  |  |
| H15       | NM_014906 | <i>PPM1E</i>         | 1           | 198971   | TACAAATAgtaagtagctggcctgctgctgctggg    | M26                                                 |                                        |  |  |
| H16       | NM_032853 | <i>MUM1</i>          | 3           | 1300     | GAGAAAAgttaagttgtgttttaataactgttt      | YES, <i>Mum1</i>                                    | AAGAAAAgttaagtagctgttttttttttttt       |  |  |
| H17       | NM_022737 | <i>LPPR2</i>         | 8           | 342      | CTCGAAAgttaagttggcgcaggtaaagggggccgg   | M21                                                 |                                        |  |  |
| H18       | NM_017814 | <i>TMEM161A</i>      | 8           | 104      | ATGTGCAgtaagtaggctgctgctgggggggga      | YES, NM_145597                                      | CTGCTACAgtagggctctccaggtagtagtga       |  |  |
| H19       | NM_003419 | <i>ZNF345</i>        | 1           | 1213     | AAGAGGAAgttaagtagcaagagtggggattgttac   | NO ORTHOLOG                                         |                                        |  |  |
| H20       | NM_012344 | <i>NTSR2</i>         | 2           | 1834     | GGTTCTCAgttaagtagctctgtaacatcccccaag   | M6                                                  |                                        |  |  |
| H21       | NM_004027 | <i>INPP4A</i>        | 6           | 284      | AGGGAACAgtaagtagtagtctgtagtctgtgggatt  | M1                                                  |                                        |  |  |
| H22       | NM_004543 | <i>NEB</i>           | 11          | 671      | TTAGCACAgtaagtagggaaggatgctgctgtgtca   | NO, XM_130232                                       | TCAGCTCAgtaagccggatccggccagatgctctg    |  |  |
| H23       | NM_198851 | <i>C22orf34</i>      | 4           | 187      | CTAAAATAgttgagtagcagagcagaggggtgggaa   | NO ORTHOLOG                                         |                                        |  |  |
| H24       | NM_016173 | <i>HEMK1</i>         | 1           | 378      | CCAAAACAgtaagtagtagtctcaagagcagaga     | M24                                                 |                                        |  |  |
| H25       | NM_198196 | <i>CD96</i>          | 11          | 12792    | CAAAAAATgttaagtagtagtctgctgctgagttcc   | M9                                                  |                                        |  |  |
| H26       | NM_145026 | <i>SPATS1</i>        | 1           | 9492     | GACCTACAgttgagttcaagaatccagctgtggag    | NO, NM_027649                                       | TTCCAAGgttagtaggaagcttccccaggggaagtag  |  |  |
| H27       | NM_033481 | <i>FBXO9</i>         | 3           | 2848     | GAAGAAAAgttaagtagtagatattgtaacaaatta   | M23                                                 |                                        |  |  |
| H28       | NM_020320 | <i>RARSL</i>         | 2           | 5285     | CAAAAAGAgtaagtagataactgtaacatctat      | M16                                                 |                                        |  |  |
| H29       | NM_004956 | <i>ETV1</i>          | 10          | 1540     | GAACAGAAgttaagtagtccaccagaaattccgtgt   | M7                                                  |                                        |  |  |
| H30       | NM_001735 | <i>C5</i>            | 14          | 979      | TGGAAGAgtaagtagtagtctgctgctgctgctgtt   | M13                                                 |                                        |  |  |
| H31       | NM_024657 | <i>MORC4</i>         | 9           | 402      | AAGAAACAgttgagtagtagatagaggttctctac    | M25                                                 |                                        |  |  |
| H32       | XM_378381 | <i>DKFZp686F0839</i> | 9           | 142      | ATGGAGCAgttaagtagtagtagtagtagtagtagtag | NO ORTHOLOG                                         |                                        |  |  |
| H33       | XM_290670 | <i>LOC23117</i>      | 15          | 21700    | AAATTAAGgttaagtagtagtagtagtagtagtagtag | NO ORTHOLOG                                         |                                        |  |  |
| H34       | XM_377716 | <i>LOC402057</i>     | 1           | 87       | ATCCTGTTgttaagtagtagtagtagtagtagtagtag | NO ORTHOLOG                                         |                                        |  |  |
| H35       | XM_497955 | <i>NO NAME</i>       | 2           | 10117    | AGAACTACgttaagtagtagtagtagtagtagtagtag | ENSEMBL, UCSC NOT FOUND IN ENSEMBL, UCSC            |                                        |  |  |
| H36       | XM_379482 | <i>LOC401320</i>     | 2           | 4835     | CAAAAACAgtaagtagtagtagtagtagtagtagtag  | ENSEMBL, UCSC                                       |                                        |  |  |
| H37       | XM_059830 | <i>LOC136242</i>     | 3           | 1225     | TATTTACCgttagtagtagtagtagtagtagtagtag  | NO, <i>1700016G05Rik</i> NOT FOUND IN ENSEMBL, UCSC | TATTTACCgttagtagtagtagtagtagtagtagtag  |  |  |
| H38       | XM_374277 | <i>NO NAME</i>       | 1           | 466      | CCCCAAAgtaagtagtagtagtagtagtagtagtag   | Maps different in ENSEMBL, UCSC                     |                                        |  |  |
| H39       | XM_088578 | <i>LOC375748</i>     | 1           | 3764     | CAGAATGAgttgagtagtagtagtagtagtagtagtag | ENSEMBL, UCSC                                       |                                        |  |  |
| H40       | XM_088525 | <i>FAM125B</i>       | 1           | 13498    | GGGGAACAgtaagtagtagtagtagtagtagtagtag  | M12                                                 |                                        |  |  |
| Search    |           | NYGGTYRAGT           | 7           |          |                                        |                                                     |                                        |  |  |
| H41       | NM_144569 | <i>SPOCD1</i>        | 10          | 2355     | ATCTGGTGgttaagtagtagtagtagtagtagtagtag | NO ORTHOLOG                                         |                                        |  |  |
| H42       | NM_001225 | <i>CASP4</i>         | 8           | 1775     | TGAAAATGgttaagtagtagtagtagtagtagtagtag | NO, NM_007609                                       | TGAGAACAgtaagtagtagtagtagtagtagtagtag  |  |  |
| H43       | NM_017828 | <i>COMMD4</i>        | 2           | 222      | CCAAGATGgttagtagtagtagtagtagtagtagtag  | M22                                                 |                                        |  |  |
| H44       | NM_014705 | <i>DOCK4</i>         | 4           | 4972     | TCTATGTGgttaagtagtagtagtagtagtagtagtag | NO, XM_358307                                       | TCTATGTGgttaagtagtagtagtagtagtagtagtag |  |  |
| H45       | NM_022444 | <i>SLC13A1</i>       | 11          | 2334     | AGAAATTGgttagtagtagtagtagtagtagtagtag  | M17                                                 |                                        |  |  |
| H46       | XM_496074 | <i>LOC440287</i>     | 5           | 221      | CCAAGATGgttagtagtagtagtagtagtagtagtag  | NO ORTHOLOG                                         |                                        |  |  |
| H47       | XM_496078 | <i>LOC440292</i>     | 2           | 222      | CCAAGATGgttagtagtagtagtagtagtagtagtag  | NO ORTHOLOG                                         |                                        |  |  |
| Search    |           | NYAGTRRAGT           | 4           |          |                                        |                                                     |                                        |  |  |
| H48       | NM_001851 | <i>COL9A1</i>        | 19          | 2534     | GACCTCCAgtaagtagtagtagtagtagtagtagtag  | M41                                                 |                                        |  |  |
| H49       | XM_372840 | <i>LOC391209</i>     | 1           | 160      | TCCCTGCAgttagtagtagtagtagtagtagtagtag  | ENSEMBL, UCSC NOT FOUND IN ENSEMBL, UCSC            |                                        |  |  |
| H50       | XM_114158 | <i>NO NAME</i>       | 9           | 94       | AGGAGCCAgttagtagtagtagtagtagtagtagtag  | ENSEMBL, UCSC                                       |                                        |  |  |
| H51       | XM_379433 | <i>NO NAME</i>       | 4           | 1689     | ATACCTTAgtaagtagtagtagtagtagtagtagtag  | NOT FOUND IN                                        |                                        |  |  |

|                                      |           |                           |             |          |                                        |                                         | ENSEMBL, UCSC                        |
|--------------------------------------|-----------|---------------------------|-------------|----------|----------------------------------------|-----------------------------------------|--------------------------------------|
|                                      | Search    | NYAGTYYAGT                | 1           |          |                                        |                                         |                                      |
| H52                                  | NM_006256 | <i>PKN2</i>               | 7           | 1280     | CTTGTCCAgttcagtaaccagatcttttaaaatcatgt | M46                                     |                                      |
|                                      | Search    | NYAGTYRBTG                | 1           |          |                                        |                                         |                                      |
| H53                                  | NM_139025 | <i>ADAMTS13</i>           | 25          | 466      | GCAGTCCAgttatgtcctctcctcctcctcagcgca   | NO, NM_001001322                        | AGAGCATGgttaggtttcctctttcctgtggga    |
|                                      | Search    | NYAGTYRAHT                | 1           |          |                                        |                                         |                                      |
| H54                                  | XM_370939 | LOC388221                 | 5           | 3534     | AATTTGTAgttaattgacctcagtcacctgactaca   | NOT FOUND IN ENSEMBL, UCSC              |                                      |
|                                      | Search    | NYAGTYRAGV                | 4           |          |                                        |                                         |                                      |
| H55                                  | NM_004476 | <i>FOLH1</i>              | 8           | 882      | TCTACACAgttaagagactatttaatttaactctt    | M52                                     |                                      |
| H56                                  | NM_153696 | <i>PSMAL</i>              | 3           | 887      | TCTACACAgttaagagactatttaatttaactctt    | NO ORTHOLOG                             |                                      |
| H57                                  | NM_024721 | <i>ZFHX4</i>              | 4           | 9276     | GAGCAGCAgttgagatcagctcaggtaatggtccta   | NO, NM_030708                           | GGCCTCAGgttaaatgtattctctcagaagctagcc |
| H58                                  | XM_375358 | <i>Klkb14</i>             | 5           | 1216     | CATCTGCAgttaaggcattcctcccagagaaggct    | YES, XM_134585                          | CGTCTGCAgttaatgcattcctctctagaggagct  |
| Manually added human/mouse orthologs |           |                           |             |          |                                        |                                         |                                      |
| H59                                  | NM_015199 | <i>ANKRD28 (KIAA0379)</i> | 21          | 5662     | CTACAATGgttaagtatacaacaacaatgcatatcat  | M39                                     |                                      |
| MOUSE <i>Mus musculus</i>            |           |                           |             |          |                                        |                                         |                                      |
|                                      | Search    | NNHGTIRAGT                | 35          |          |                                        |                                         |                                      |
| Accession                            | Gene Name | Int. #                    | Int. Length | Sequence | Orthologs                              |                                         |                                      |
| M1                                   | NM_030266 | <i>Inpp4a</i>             | 4           | 260      | AGGGAACAgttaagtatcgtcagtcggcaacagtct   | H21                                     |                                      |
| M2                                   | NM_007495 | <i>Astn1</i>              | 17          | 8557     | CATCATTAgtaagtcagaatgtctctcctcctct     | Intron not in human ortholog, NM_004319 |                                      |
| M3                                   | NM_007622 | <i>Cbx1</i>               | 5           | 1420     | TTAGCCCTgttgatcaccgccctctcaactctgact   | Intron not in human ortholog, NM_006807 |                                      |
| M4                                   | NM_008379 | <i>Kpnb1</i>              | 19          | 697      | CGTACACCgttgatataagccagctcccaaatcc     | H14                                     |                                      |
| M5                                   | NM_134037 | <i>Acly</i>               | 5           | 447      | AAGAAAGAgttgagttctgagagggcaacgctgggca  | H13                                     |                                      |
| M6                                   | NM_008747 | <i>Ntsr2</i>              | 2           | 1495     | GGTTCTCAgttaagtcctcaccacaatccctgagg    | H20                                     |                                      |
| M7                                   | NM_007960 | <i>Erv1</i>               | 9           | 1873     | GAACAGAAgttaagtcatttataagattctataa     | H29                                     |                                      |
| M8                                   | NM_030225 | <i>Dlst</i>               | 4           | 113      | TGTGTGCAgttaagtacctgattcttctgaatggact  | NO, NM_001933                           | TGTATGCAgttaagctctctcttctggaaatgaatt |
| M9                                   | NM_032465 | <i>Cd96</i>               | 10          | 1677     | CAAGAACTgttgatattgtcatggctcctccattcat  | H25                                     |                                      |
| M10                                  | NM_009985 | <i>Ctsw</i>               | 6           | 86       | CAACAACAgttgagtcaccagcctgtggaggtcagt   | NO, NM_001335                           | CAACAACAgttgagtcaccagcctgtggaggtcagt |
| M11                                  | NM_028412 | <i>Ciz1</i>               | 1           | 507      | CAGGATTAgtaagtgccgttggctatctgcgaggg    | NO, NM_012127                           | CCGACAGgtgtgtgtgtctgctggaggccgtgcc   |
| M12                                  | NM_175184 | <i>2610528K11Rik</i>      | 1           | 12860    | GGGGAACAgttaagtcagcccgcgggaagacgggc    | H40                                     |                                      |
| M13                                  | NM_010406 | <i>Hc</i>                 | 14          | 1361     | TGCAAAAGgttaagtgaattccgtgtgacctgggg    | H30                                     |                                      |
| M14                                  | NM_011978 | <i>Slc27a2</i>            | 5           | 2964     | TACAAAGAgtaagtaccgcaagatgacaaatgtg     | NO, NM_003645                           | TACAGAAAgtaagtacattgaaatgagagcatacgt |
| M15                                  | NM_009797 | <i>Capz1</i>              | 5           | 4924     | TCTGTACTgttaagtatctcctgtccctcgagaaca   | H5                                      |                                      |
| M16                                  | NM_181406 | <i>Rars1</i>              | 2           | 4784     | AAAAAAGAgtaagtatcctgtagtatctcaaatg     | H28                                     |                                      |
| M17                                  | NM_019481 | <i>Slc13a1</i>            | 11          | 2557     | AGAAATTAgttgagttatctttgaaactgaattat    | H45                                     |                                      |
| M18                                  | NM_019715 | <i>Kemf1</i>              | 3           | 3286     | CCTAGAAAgttgagtaagcagtcacccagagcacagg  | Intron not in human ortholog, NM_020122 |                                      |
| M19                                  | NM_008186 | <i>Gtf2h1</i>             | 8           | 103      | AGGAAACAgttaagtacatgatgaagctgtcactga   | H9                                      |                                      |
| M20                                  | NM_133214 | <i>BC017612</i>           | 2           | 20057    | TGCATACAgttgagtcaccattagtctctctgtga    | NO, <i>C11orf75</i>                     | GCGGGCAGgtggctgggagcgcgcccggcgcgcc   |
| M21                                  | NM_144935 | <i>BC018242</i>           | 7           | 329      | CTCGAAAgttaagtgtgctcagtaagggggccgg     | H17                                     |                                      |
| M22                                  | NM_025417 | <i>Comm4</i>              | 1           | 227      | CCAAAATTgttaagtgcactgtttactagggttggg   | H43                                     |                                      |
| M23                                  | NM_023605 | <i>Fbxo9</i>              | 3           | 1684     | GAAGAAAgttaagtctgaagtcctcaacaataa      | H27                                     |                                      |
| M24                                  | NM_133984 | <i>Hemk1</i>              | 2           | 338      | CCAAAACAgttaagttaagttagggagacaggag     | H24                                     |                                      |
| M25                                  | NM_029413 | <i>Morc4</i>              | 12          | 498      | AAGCAACAgttgagttacacgggctgtttctccat    | H31                                     |                                      |
| M26                                  | XM_484060 | <i>Ppm1e</i>              | 1           | 109399   | TACAATAgttaagtgcgggctcgcgcccgggtg      | H15                                     |                                      |
| M27                                  | XM_484173 | <i>9030205A07Rik</i>      | 21          | 9472     | CAAAATCCgttgagttatctctctctctctgtgac    | H11                                     |                                      |
| M28                                  | XM_488661 | <i>NO NAME</i>            | 5           | 3011     | CCAGCACTgttaagtggaaatcataatcttctgg     | NOT FOUND IN ENSEMBL, UCSC              |                                      |
| M29                                  | XM_358492 | <i>NO NAME</i>            | 1           | 15613    | GGCATTCAgttaagtaattctactgagtcacacagt   | NOT FOUND IN ENSEMBL, UCSC              |                                      |
| M30                                  | XM_485305 | <i>NO NAME</i>            | 2           | 205      | CCAAAACAgttaagttataagtcataaagtgggttt   | NOT FOUND IN ENSEMBL, UCSC              |                                      |
| M31                                  | XM_485339 | <i>170008P02Rik</i>       | 4           | 1296     | AAATCAATgttgagttatatacaataatattagaat   | Intron not in human ortholog            |                                      |

|     |                                      |                                |        |             |                                         |                                                       |                                        |
|-----|--------------------------------------|--------------------------------|--------|-------------|-----------------------------------------|-------------------------------------------------------|----------------------------------------|
| M32 | XM_110525                            | <i>Cnkr1</i>                   | 15     | 161         | AAAAAATAgttaagtcttgaatgagatggattgggg    | H1                                                    |                                        |
| M33 | XM_357710                            | <i>LOC384557</i>               | 11     | 941         | TGTAAACAgttaagtactctcaatggaactctgttgc   | Different in ENSEMBL<br>NOT FOUND IN<br>ENSEMBL, UCSC |                                        |
| M34 | XM_134048                            | <i>NO NAME</i>                 | 4      | 14935       | TAAAAACAgttaagtactgcatgtttccacatactt    | NOT FOUND IN<br>ENSEMBL, UCSC                         |                                        |
| M35 | XM_487089                            | <i>NO NAME</i>                 | 8      | 241         | AGTTTGGAgttgagtgaggagggcaagagcaggataga  | NOT FOUND IN<br>ENSEMBL, UCSC                         |                                        |
|     | Search                               | NYGGTYRAGT                     | 5      |             |                                         |                                                       |                                        |
| M36 | NM_145930                            | <i>AW549877</i>                | 1      | 92          | CCAACATGgttgagtgtctagtaaagttctaagtgt    | Intron not in human<br>ortholog                       |                                        |
| M37 | NM_153795                            | <i>BC032204</i>                | 9      | 85          | ATCTTCCGgttaagtatagggcctgctgaggagtg     | <i>NO, URP2_HUMAN</i>                                 | ATTCTTCGgttgagttggggccagatgagcagccctg  |
| M38 | NM_010576                            | <i>Itga4</i>                   | 16     | 2149        | GAAAAATGgttgagtatttctgtatttaaacataa     | <i>NO, NM_000885</i>                                  | AAAAAACAgtaggaatatttctttatcaaatatt     |
| M39 | XM_127673                            | <i>Ankrd28</i>                 | 21     | 1747        | CTACAATGgttaagtatcagataaaacctgctttgag   | <i>YES, ANKRD28</i><br><i>(KIAA0379)</i>              | CTACAATGgttaagtatacaaacacaatgcatatcat  |
| M40 | XM_131242                            | <i>4930579F01Rik</i>           | 7      | 1282        | GTCACACGgttaagtacagttgtgtacttcagatg     | <i>NO, C4orf17</i>                                    | ACCAAAAGgttaagtacagtttttggtaactattgagt |
|     | Search                               | NYAGTRRAGT                     | 5      |             |                                         |                                                       |                                        |
| M41 | NM_007740                            | <i>Col9a1</i>                  | 19     | 2944        | GACCTCCAgttaagtattttttattgtttaccaag     | H49                                                   |                                        |
| M42 | XM_483979                            | <i>NO NAME</i>                 | 2      | 128         | TATTTCTAgttgagtggtgtccattgggccccaaatc   | NOT FOUND IN<br>ENSEMBL, UCSC                         |                                        |
| M43 | XM_283061                            | <i>Hectd1</i>                  | 7      | 886         | TCAGGTCAgttaagtgcgtgtgtatcatttagtttc    | Intron not in human<br>ortholog                       |                                        |
| M44 | XM_484630                            | <i>NO NAME</i>                 | 1      | 1470        | TAGCACCAGtaaaagtctcttccatgcatgccact     | NOT FOUND IN<br>ENSEMBL, UCSC                         |                                        |
| M45 | XM_142197                            | <i>Rga1</i>                    | 2      | 620         | GTCTCTCAgttaagtggtaaaagcatcagaatgtcc    | Intron not in human ortholog, NM_020769               |                                        |
|     | Search                               | NYAGTYYAGT                     | 2      |             |                                         |                                                       |                                        |
| M46 | NM_178654                            | <i>Pkn2</i>                    | 6      | 873         | CTTGTCAGttcagtaaccatactttaaagtcttgc     | H53                                                   |                                        |
| M47 | XM_486735                            | <i>No NAME</i>                 | 2      | 16518       | TTAGGTTAgttttagtgatgtaaatccctgtccctac   | NOT FOUND IN<br>ENSEMBL, UCSC                         |                                        |
|     | Search                               | NYAGTYRBT                      | 3      |             |                                         |                                                       |                                        |
| M48 | NM_010655                            | <i>Kpna2</i>                   | 12     | 42411       | AAAGACCAgttcgggtctacagatgagttccaggacag  | Intron not in human ortholog, NM_002266               |                                        |
| M49 | XM_139844                            | <i>EG240055</i>                | 1      | 111         | TTCAGCCAgttgggtagcatgatcccaagccacacc    | Does not map to the gene in ENSEMBL, UCSC             |                                        |
| M50 | XM_489266                            | <i>NO NAME</i>                 | 1      | 759         | TTCCCTAgttatgtccacatcttataaaaaatcca     | NOT FOUND IN<br>ENSEMBL, UCSC                         |                                        |
|     | Search                               | NYAGTYRAHT                     | 1      |             |                                         |                                                       |                                        |
| M51 | NM_177011                            | <i>9330154K18Rik</i>           | 6      | 639         | TGCAAGCAgttgaaatggaaccctaagtctctctg     | Intron not in ENSEMBL, gene not found in UCSC         |                                        |
|     | Search                               | NYAGTYRAGV                     | 5      |             |                                         |                                                       |                                        |
| M52 | NM_016770                            | <i>Folh1</i>                   | 8      | 588         | TCAACACAgttgagatattttctaagtattctgtca    | H56                                                   |                                        |
| M53 | XM_488594                            | <i>LOC432562</i>               | 1      | 2429        | CAAGGCCAgttcaagcactgacctgaaagtctttgtg   | NOT FOUND IN<br>ENSEMBL, UCSC                         |                                        |
| M54 | XM_358474                            | <i>NO NAME</i>                 | 3      | 2725        | TGTTGCCAgttcaagaaaaaacactgattccacaa     | NOT FOUND IN<br>ENSEMBL, UCSC                         |                                        |
| M55 | XM_488085                            | <i>NO NAME</i>                 | 5      | 103         | ATGGCATAgtcaaggtctgagaatgggaagcttatcatc | NOT FOUND IN<br>ENSEMBL, UCSC                         |                                        |
| M56 | XM_358170                            | <i>NO NAME</i>                 | 1      | 119         | ACTTCACAgttgagccctgaacaacactgtggagcac   | NOT FOUND IN<br>ENSEMBL, UCSC                         |                                        |
|     | Manually added human/mouse orthologs |                                | 3      |             |                                         |                                                       |                                        |
| M57 | NM_023431                            | <i>Mum1</i>                    | 3      | 976         | AAGGAAAgtttaagtgtgctgttttttttttttt      | H16                                                   |                                        |
| M58 | NM_145597                            | <i>Tmem161a</i>                | 8      | 87          | CTGCTACAgttaggcgggtctcccaggtaggattgga   | H18                                                   |                                        |
| M59 | XM_134585                            | <i>Klkb14</i>                  | 5      | 857         | CGTCTGCAGttaatgattcctctctagaggaggtct    | H58                                                   |                                        |
|     | FRUITFLY                             | <i>Drosophila melanogaster</i> |        |             |                                         |                                                       |                                        |
|     | Search                               | NNHGTYRAGT                     | 10     |             |                                         |                                                       |                                        |
|     | Accession                            | Gene Name                      | Int. # | Int. Length | Sequence                                |                                                       |                                        |
| D1  | NM_057884                            | <i>ppk</i>                     | 2      | 185         | GATGAGGAgttgatttccagcatatacttttag       |                                                       |                                        |
| D2  | NM_137551                            | <i>CG15117</i>                 | 4      | 61          | GATACAGAgttgatttccgacacctgaaaggatt      |                                                       |                                        |
| D3  | NM_139436                            | <i>CG15822</i>                 | 1      | 1762        | AAAACCAgttcagatttctacatgaacaacacgca     |                                                       |                                        |
| D4  | NM_168190                            | <i>NO NAME</i>                 | 1      | 283         | GCCAAAGCgtcaactgtggcgtgactcaaatgt       |                                                       |                                        |

|     |           |                                                           |   |       |                                        |
|-----|-----------|-----------------------------------------------------------|---|-------|----------------------------------------|
| D5  | NM_140439 | <i>CG5842-RA</i><br>( <i>nan</i> )                        | 4 | 60    | CGAATACAgttaagtattgccttatattataataca   |
| D6  | NM_169384 | <i>CG31386</i>                                            | 3 | 6050  | AAAAACCAgttgagtaattatgtactgcaacaacaaa  |
| D7  | NM_142173 | <i>CG4210-RA</i><br><i>CG7985-RA</i><br>( <i>CG7985</i> ) | 1 | 63    | TGATTCAAgttgagttttataagattcctattttaata |
| D8  | NM_142432 | <i>CG1786-RA</i><br>( <i>Cyp318a1</i> )                   | 1 | 11970 | CTTTAACAgttaagttcgaatggttgaiaaaccaat   |
| D9  | NM_167318 | <i>CG3291-RA</i><br>( <i>pcm</i> )                        | 5 | 84    | CAGGAACAgttgagtgtagagtcgaagccattagagg  |
| D10 | NM_078684 |                                                           |   |       |                                        |
|     | Search    | NYGGTYRAGT                                                | 3 |       |                                        |
| D11 | NM_166710 | <i>CG32013</i><br><i>CG4795-RA</i> ,<br>( <i>Cpn</i> )    | 1 | 89    | CGGCGGTGgtcagtcggcaccgactcaacggcggt    |
| D12 | NM_169454 |                                                           | 2 | 67    | AAACTACGgttgagatcctgtagccgaaagtctctg   |
| D13 | NM_169605 | <i>CG3631-RB</i>                                          | 1 | 72    | AACAACGgttaagtcatagaaaagtatttgcctca    |
|     | Search    | NYAGTRRAGT                                                | 0 |       |                                        |
|     | Search    | NYAGTYYAGT                                                | 1 |       |                                        |
| D14 | NM_167187 | <i>CG17754-RC</i>                                         | 6 | 1279  | GTGCTACAgtttagtccaaccaatccacttctggtt   |
|     | Search    | NYAGTYRBGT                                                | 2 |       |                                        |
| D15 | NM_166504 | <i>CG11474-RB</i>                                         | 1 | 71    | GGTGGTAgttgtgtcacttacctgacctgagc       |
| D16 | NM_130679 | <i>CG3526-RB</i>                                          | 1 | 1038  | TGCGTTTAgttgtgtttatgcttaaatgcgtcatt    |
|     | Search    | NYAGTYRAHT                                                | 2 |       |                                        |
| D17 | NM_168054 | <i>CG32259-RB</i>                                         | 4 | 308   | CGGCGCCAgttaattgcaactgctcgataacctac    |
| D18 | NM_170040 | <i>CG31139-RA</i>                                         | 1 | 56    | CTCAAAATAgttaactatagaaataataataataa    |
|     | Search    | NYAGTYRAGV                                                | 2 |       |                                        |
| D19 | NM_141447 | <i>CG14609-RA</i>                                         | 6 | 58    | GGAGAATAgttgagcagctctacaataaaaagtgc    |
| D20 | NM_133036 | <i>CG15373-RA</i>                                         | 5 | 109   | TCGCACCAgttgagcattgattataagaatagaaga   |

WORM *Caenorhabditis elegans*

| Accession | Gene Name | Int. #                                                   | Int. Length | Sequence |                                        |
|-----------|-----------|----------------------------------------------------------|-------------|----------|----------------------------------------|
|           |           | 11                                                       |             |          |                                        |
|           | Search    | NNHGYRAGT                                                |             |          |                                        |
| C1        | NM_071062 | <i>Y46H3D.4</i>                                          | 4           | 43       | CTTTAAAAgttgagttttgatcttgaagaattgccaat |
| C2        | NM_071184 | <i>srbc-22</i>                                           | 3           | 63       | CAAAATCAgttgagttattatccaattgaacatttt   |
| C3        | NM_074995 | <i>F47H4.2</i>                                           | 1           | 1995     | TGAAAAATgttgagttatttcaagtcggaagtaaa    |
| C4        | NM_075290 | <i>Y80D3A.8</i>                                          | 4           | 119      | AGCGATGAgtaagtgattttccgattgagttgtaa    |
| C5        | NM_068590 | <i>C01G5.9</i>                                           | 3           | 357      | TCAAAAAATgttaagttttatctttaaattgttaga   |
| C6        | NM_069297 | <i>T05A1.7</i>                                           | 2           | 150      | GTGGATATgtcaagtagagaagaataatgaactact   |
| C7        | NM_070325 | <i>F02H6.3</i>                                           | 3           | 66       | AAAAAGATgttaagtgaagagtttcaattctagta    |
| C8        | NM_061415 | <i>F46F5.12</i>                                          | 2           | 44       | TGGCATCAgttgagtcattttcctgcaacaattaat   |
| C9        | NM_061925 | <i>NO NAME</i><br><i>W02B12.4</i><br>( <i>esterase</i> ) | 4           | 61       | TAGAAAAATgttgagtcgaaaattgaaattcgcgcca  |
| C10       | NM_064042 |                                                          | 3           | 578      | TTCAAGAAgttgagttttgaactactaccggtac     |
| C11       | NM_064547 | <i>K09E4.4</i>                                           | 3           | 53       | TCTAAACAgttgagtcctcagggcaatcaggttgata  |
|           | Search    | NYGGTYRAGT                                               | 4           |          |                                        |
| C12       | NM_070973 | <i>Y50D4B.7</i>                                          | 5           | 159      | CTGGGGTGttaagttttattgtaatttaaacgaac    |
| C13       | NM_071110 | <i>Y46H3A.5</i>                                          | 2           | 61       | TGCGCATGgtcaggtttctcttttcacggccacgta   |
| C14       | NM_072502 | <i>F18E3.10</i>                                          | 1           | 131      | GGTTCCCGgttgagttgatgcatatcatcgtgtgta   |
| C15       | NM_066589 | <i>F59B2.3</i>                                           | 2           | 50       | ATTGAACGgttgagttgttcatttaacataattttc   |
|           | Search    | NYAGTRRAGT                                               | 3           |          |                                        |
| C16       | NM_059201 | <i>T05E8.1</i>                                           | 5           | 185      | TCGCGTCAgtgaagttgagtaagatctactctcca    |



|       |           |                                            |    |      |                                        |
|-------|-----------|--------------------------------------------|----|------|----------------------------------------|
| C17   | NM_074054 | <i>srx-42</i>                              | 7  | 1497 | ACAAAGCAgtgaagtgaaggaaaaaaagaatgaataaa |
| C18   | NM_061650 | <i>F45C12.9</i>                            | 2  | 75   | TCTTGCAGtggagttatgaactggaacacctgaatt   |
|       | Search    | NYAGTYYAGT                                 | 1  |      |                                        |
| C19   | NM_171206 | <i>NO NAME</i>                             | 1  | 45   | GAATCTTAgttcagtcattacgattttcagatga     |
|       | Search    | NYAGTYRBGT                                 | 14 |      |                                        |
| C20   | NM_058800 | <i>D1037.5</i><br>( <i>phospholipase</i> ) | 4  | 540  | AACTAACAgttgggttgatgttttaactactgag     |
| C21   | NM_059316 | <i>B0207.8</i>                             | 3  | 48   | AAAATATAgttaggtgaaacaattccggacatgtca   |
| C22   | NM_060727 | <i>T09E11.5</i>                            | 1  | 45   | GTGGATCAgttaagttttcagtgataacctccagcat  |
| C23   | NM_060728 | <i>T09E11.4</i>                            | 1  | 44   | GTTGATCAgttaggtttttcagtgataacctccagcat |
| C24   | NM_071183 | <i>srbc-21</i>                             | 2  | 50   | CCAAAACAgttgcgtttatccgcattttctaaatt    |
| C25   | NM_072749 | <i>Y51B11A.1</i>                           | 1  | 104  | ATCAGACAgttatgtttcttaagaagtccgacc      |
| C26   | NM_074793 | <i>nhr-271</i>                             | 5  | 78   | CGGAAATAgttagtaattgtaattgtaattgaaa     |
| C27   | NM_075237 | <i>Y69H2.2</i>                             | 10 | 310  | TGAAACTAgttgggttgaaaaaatcgataattatc    |
| C28   | NM_067539 | <i>asm-3</i>                               | 7  | 53   | TTGGAATAgttgggtttttgaagattggaaaaaa     |
| C29   | NM_068159 | <i>R08C7.6</i>                             | 4  | 1215 | GATTGATAgttaggtttttcggctctcatagttt     |
| C30   | NM_070351 | <i>LLC1.2</i>                              | 4  | 3370 | AATTAATAgttgggtttttttggaatttgaggg      |
| C31   | NM_062809 | <i>R12C12.7</i>                            | 1  | 362  | TTTTGTAgttgggtgatattcgagataaatcgaa     |
| C32   | NM_075907 | <i>tbx-31</i>                              | 2  | 223  | TTTCACAgttatgtaataagggaacatcaatggtt    |
| C33   | NM_065413 | <i>unc-79</i>                              | 2  | 82   | GCCAGTCAgttgggtattttccaagggaattgataa   |
|       | Search    | NYAGTYRAHT                                 | 23 |      |                                        |
| C34   | NM_058984 | <i>Y119C1B.9</i>                           | 1  | 397  | AATAATCAgttaatttttagttctatcaattgaaat   |
| C35   | NM_059145 | <i>C32E12.4</i>                            | 21 | 53   | TGGCTATAgttaaattgaaattgtagattatgcaca   |
| C36   | NM_059245 | <i>F46F11.7</i>                            | 1  | 61   | TCGGTACAgttaattctgataaagaatgatacaac    |
| C37   | NM_071952 | <i>K11D12.8</i>                            | 3  | 97   | TTGGATCAgttgaataaaactaaaataatttgac     |
| C38   | NM_074745 | <i>NO NAME</i>                             | 5  | 123  | TTGCAGCAgttgaatatgacgtaagtgaagtggagc   |
| C39   | NM_075053 | <i>srz-45</i>                              | 3  | 86   | TTCTGATAgttgattgataacaatgaagatccgat    |
| C40   | NM_075147 | <i>C14A6.5</i>                             | 7  | 944  | TTGTCCCAgttgattttcgaatcttcaaccgtttt    |
| C41   | NM_067921 | <i>cyp-25A5</i>                            | 1  | 293  | GACCACCAgttaattggctttagggaaattgaaatt   |
| C42   | NM_068589 | <i>C01G5.7</i>                             | 3  | 46   | ATTAGTTAgttactttaactttaaaactaaaatgct   |
| C43   | NM_070559 | <i>Y51H4A.2</i>                            | 1  | 82   | AGCACTCAgtcaatttagttagtttggtgtgtgtt    |
| C44   | NM_182271 | <i>K02E7.4</i>                             | 2  | 246  | TATGAACAgttaattgataataatattgatgttat    |
| C45   | NM_061573 | <i>Y51H7C.12</i>                           | 2  | 1095 | ATTGTTCAgttaattttaactgtgataactataaa    |
| C46   | NM_061922 | <i>sri-47</i>                              | 2  | 49   | CCAAAATAgttaattgaaattgaaattcagtcaaa    |
| C47   | NM_062134 | <i>F18A12.7</i>                            | 6  | 48   | TCTGGTCAgttaatttttaacaaaactgactgaaat   |
| C48   | NM_063632 | <i>T19H5.1</i>                             | 3  | 794  | ATTCAATAgttcaattgaaatgcaatcacttgacggat |
| C49   | NM_064069 | <i>NO NAME</i>                             | 1  | 748  | CAGTAACAgttaatttaaatattttttggtccgatt   |
| C50   | NM_076485 | <i>H28G03.3</i>                            | 2  | 44   | TAAAAACAgttaatttttactacttaaacatctaaa   |
| C51   | NM_076877 | <i>F46C8.8</i>                             | 4  | 57   | AGGTATCAgttaaatgttcgtagtatatttccctgtt  |
| C52   | NM_077618 | <i>W03G11.4</i>                            | 4  | 797  | TTCCCCCAgtcaattatcactctttttttttgttt    |
| C53   | NM_077707 | <i>R09A8.2</i>                             | 6  | 105  | AAAGGCTAgttgatttaagtagactcacttaatgat   |
| C54   | NM_078201 | <i>Y7A5A.9</i>                             | 5  | 614  | TTGTTCCAgttaactttccgaaaaactaatatgitt   |
| C55   | NM_064757 | <i>ver-2</i>                               | 1  | 258  | AAACGTTAgttaaactgtttgaatttgatgaattt    |
| C56   | NM_067102 | <i>Y66A7A.5</i>                            | 5  | 933  | AAAATCCAgttgaattttctaaattttttattttt    |
|       | Search    | NYAGTYRAGV                                 | 7  |      |                                        |
| C57   | NM_071343 | <i>srg-61</i>                              | 3  | 56   | G TTCACCAgttaagcaaaaggtaaaagccgctactgt |
| C58   | NM_072056 | <i>C24G6.3</i>                             | 13 | 74   | CCTGAACAgttgagatttttttaatttttaataaaa   |
| C59   | NM_073280 | <i>Y32F6A.1</i>                            | 6  | 43   | GTCTATCAgttgagatatttatagaagttaatagt    |
| C60   | NM_069993 | <i>sru-17</i><br><i>R09D1.9</i>            | 5  | 52   | CAGGAATAgttcaagagagcaggagacaattatgtgat |
| C61   | NM_063629 | ( <i>chitinase</i> )<br><i>R09D1.11</i>    | 3  | 44   | AGAATACAgttgagggtcgcttattttgtaataat    |
| C62   | NM_063631 | ( <i>chitinase</i> )                       | 3  | 44   | AGAATACAgttaagggtacacttatagttgtaataat  |
| C63   | NM_063632 | <i>T19H5.1</i>                             | 1  | 44   | AGGAGACAgttgagatattttgagttagacaatgac   |
| PLANT |           | <i>Arabidopsis thaliana</i>                |    |      |                                        |

| Search    | NNHGTYRAGT | 55                                                        | Int. | Int.   | Sequence                                |
|-----------|------------|-----------------------------------------------------------|------|--------|-----------------------------------------|
| Accession | Gene Name  | #                                                         | #    | Length |                                         |
| A1        | NM_099990  | <i>AT1G01080 acetyl-CoA C-acyltransferase (AT1G04710)</i> | 3    | 87     | ATGGAACAgttaagtcgttatcataaaaaaatctt     |
| A2        | NM_100351  |                                                           | 2    | 86     | ATTGTCGCgttaagttctctctctttgatattgt      |
| A3        | NM_100846  | <i>AT1G09740</i>                                          | 1    | 92     | TGGTCCCAgttagctctgttactactaattttgtgat   |
| A4        | NM_101003  | <i>AT1G11300</i>                                          | 8    | 91     | AGAATTCAGttaagtattattccaacccctttcata    |
| A5        | NM_101933  | <i>AT1G20810</i>                                          | 1    | 262    | CACTGGCCgttaagtcctcctctctcttttagctate   |
| A6        | NM_101948  | <i>AT1G20950</i>                                          | 16   | 99     | CTATTACAgttgagttttctgtatttctatcaaaa     |
| A7        | NM_102114  | <i>AT1G22670</i>                                          | 3    | 82     | CAGTCACAgttgagtattgtgatagtttaaacatc     |
| A8        | NM_102414  | <i>AT1G26520</i>                                          | 5    | 303    | ATTCAACTgttaagtcctgaaactctctctctct      |
| A9        | NM_102778  | <i>ATMRP13</i>                                            | 18   | 80     | TGCTTCCAgttaagtggaatgaaggtttacacaactc   |
| A10       | NM_102779  | <i>ATMRP12</i>                                            | 18   | 75     | TGTTTCCAgttaagtaaaatgacagcctacacaaccc   |
| A11       | NM_103331  | <i>AT1G36510</i>                                          | 3    | 492    | ACCGTTAgttgagttctgcaaatataggattgggta    |
| A12       | NM_148569  | <i>AT1G48635</i>                                          | 2    | 91     | AAAACCCAgttaagttctgtctcataaaaactgatcc   |
| A13       | NM_180628  | <i>SCD1</i>                                               | 1    | 506    | TTCCTACTgttaagttttcacaacatctttgtaatt    |
| A14       | NM_202303  | <i>AT1G54920</i>                                          | 6    | 99     | TGTTATCAgttaagttctgtcggagttctcggccct    |
| A15       | NM_105876  | <i>AT1G72175</i>                                          | 3    | 115    | ATATCGCAgttaagttcgtgatcatctgtctctctg    |
| A16       | NM_105969  | <i>AT1G73110</i>                                          | 1    | 112    | AAAAGATTgttaagttctcttttcttttgaaaaa      |
| A17       | NM_106111  | <i>AT1G74510</i>                                          | 1    | 133    | AATACTCAGttgagtttctttttttttttgat        |
| A18       | NM_106305  | <i>AT1G76550</i>                                          | 16   | 112    | CTATCTCAGttgagtttctctctattataagccta     |
| A19       | NM_106594  | <i>GA2</i>                                                | 13   | 95     | TGAAAATTgttaagttatcaatccccacacaattata   |
| A20       | NM_126485  | <i>AT2G04540</i>                                          | 3    | 89     | AGAGAACAgttaagttctctcatcttagatcaaatg    |
| A21       | NM_127266  | <i>AT2G17120</i>                                          | 2    | 106    | AATTGGACgttaagtgattgataactctgtgtgttg    |
| A22       | NM_179653  | <i>HPT1</i>                                               | 3    | 93     | TTGGCACAgttaagttctcttttaaaatgtaactctt   |
| A23       | NM_127595  | <i>AT2G20360</i>                                          | 1    | 130    | TAATCACCgttaagttctcctcattgatttttctta    |
| A24       | NM_129047  | <i>AT2G34940</i>                                          | 8    | 79     | CTTGTTCAgttaagttactgctctttttctccactt    |
| A25       | NM_129519  | <i>AT2G39630</i>                                          | 7    | 116    | TTGCTACAgttgagttctgcaactctgtttctagaca   |
| A26       | NM_129584  | <i>AT2G40260</i>                                          | 1    | 125    | CCCAGATAgttgagttcaattatataatgaatcaat    |
| A27       | NM_111905  | <i>AT3G10690</i>                                          | 1    | 95     | AGAATTCTgtttgagtgactttcttctcctcaaaagta  |
| A28       | NM_112698  | <i>AT3G18160</i>                                          | 1    | 92     | AAAACCCAgttgagttttgtaacctctctctttatt    |
| A29       | NM_112821  | <i>AT3G19340</i>                                          | 11   | 88     | TACTTCACgttaagttcttttttttcccttcttg      |
| A30       | NM_113020  | <i>ATMRP6</i>                                             | 3    | 121    | CTCACCAAgttgagttcctcagaagttgatcaaat     |
| A31       | NM_113689  | <i>MER3</i>                                               | 21   | 125    | AGAATACAgttgagttcctcctcaataactcctctggtt |
| A32       | NM_148769  | <i>AT3G29786</i>                                          | 2    | 112    | AGACGACTgttaagttttgtaattagaagtggaagcatt |
| A33       | NM_114085  | <i>AT3G42180</i>                                          | 2    | 2411   | TTTCATCAgttaagtttatacttttgattacattttct  |
| A34       | NM_114662  | <i>ATGLDH</i>                                             | 2    | 283    | AATCACAAgttaagttatcctcaacttctctatattag  |
| A35       | NM_202688  | <i>SPP2</i>                                               | 3    | 92     | AACGTGGCgttaagtttactgttatctttttgtgg     |
| A36       | NM_115099  | <i>AT3G52390</i>                                          | 3    | 88     | GAATCATAgttgagttcctctattgattctttgt      |
| A37       | NM_116013  | <i>AT3G61480</i>                                          | 6    | 89     | AACTTCCAgttgagttatcatatccgttatccctt     |
| A38       | NM_116154  | <i>AT3G62890</i>                                          | 1    | 118    | GGATGGAAgtcaagttgatcagacacaaatggaggca   |
| A39       | NM_116199  | <i>AT3G63340</i>                                          | 2    | 84     | CAAATGCAgttgagttccttttattttctctt        |
| A40       | NM_116709  | <i>CPK22</i>                                              | 10   | 163    | AAACTGAAgttaagttatctcagcatcttgctctac    |
| A41       | NM_118234  | <i>AT4G21150</i>                                          | 16   | 123    | TAGTTCTAgttgagttcctcaactcattaaaattg     |
| A42       | NM_119061  | <i>AT4G29170</i>                                          | 7    | 142    | GGCAAAGAgttgagttctcataatcgttactttgt     |
| A43       | NM_202922  | <i>AT4G31240</i>                                          | 1    | 444    | TCAGGTATgttaagttttttattacttttcaaca      |
| A44       | NM_119844  | <i>RCE1</i>                                               | 3    | 95     | TATTACCAgttaagttagttcttttttcccaactgaaac |
| A45       | NM_121001  | <i>SNG2</i>                                               | 4    | 99     | TTAGGAGTgttaagttgtttttgtctttgttacagtt   |
| A46       | NM_121132  | <i>AT5G10940</i>                                          | 9    | 501    | TATTTGCAgttgagttgttctgctgctaaagcttaaat  |
| A47       | NM_121713  | <i>AT5G17070</i>                                          | 7    | 101    | CGAAAACAgttgagtttctgattgatttcttctt      |
| A48       | NM_147869  | <i>AT5G20165</i>                                          | 5    | 93     | GGCATATAgttgagttctatctcctcacttttactgc   |
| A49       | NM_122394  | <i>AT5G24850</i>                                          | 2    | 87     | CTCGTACAgttgagttctttattgctgtgtgaag      |
| A50       | NM_122718  | <i>AT5G28350</i>                                          | 6    | 90     | AACTTCCAgttgagttatcatatccgttatccctt     |
| A51       | NM_180567  | <i>NO NAME</i>                                            | 2    | 76     | AGTTTGCTgttaagttttcttcagccctttatata     |
| A52       | NM_123979  | <i>APE2</i>                                               | 8    | 100    | CCATCATCgttaagttcactttcatttctcactagt    |
| A53       | NM_125498  | <i>AT5G61050</i>                                          | 2    | 95     | AGAATCACgttaagtttctctcctccttccagatt     |
| A54       | NM_125499  | <i>AT5G61060</i>                                          | 10   | 105    | CGTATCACgttaagttaccactctctcagcttcc      |
| A55       | NM_125658  | <i>AT5G62630</i>                                          | 4    | 84     | TATGCCAgttaagttgacgaatcgaatacaaaaagcc   |

| Search    | NYGGTYRAGT | 17               | Int. | Int.   | Sequence                           |
|-----------|------------|------------------|------|--------|------------------------------------|
| Accession | Gene Name  | #                | #    | Length |                                    |
| A56       | NM_101086  | <i>AT1G12140</i> | 4    | 85     | CCTGGATGgttaagttctctcaatcttactttgg |

|        |           |                  |    |      |                                        |
|--------|-----------|------------------|----|------|----------------------------------------|
| A57    | NM_148464 | <i>AT1G14205</i> | 4  | 119  | TTTAGCCGgttaagtaacatttagttggagttgtttt  |
| A58    | NM_104157 | <i>AT1G52790</i> | 2  | 83   | CATTGATGgttaagttaaacataatacaaaaataca   |
| A59    | NM_104543 | <i>AT1G56670</i> | 4  | 82   | CCAATACGgttaagtagagtactattaccctgacca   |
| A60    | NM_104587 | <i>AT1G58050</i> | 5  | 86   | TGCTCTTGgttaagtttaacccttttttgtaact     |
| A61    | NM_104588 | <i>AT1G58060</i> | 5  | 84   | TGATCTTGgttaagtttaactcttagtaagaatcagt  |
| A62    | NM_179988 | <i>AT2G39670</i> | 1  | 71   | CAACCTCGgtcaagtaaatgatctgattttgcatata  |
| A63    | NM_180001 | <i>AT2G40640</i> | 7  | 73   | AATGGATGgttaagctctgtgctctatctccata     |
| A64    | NM_180313 | <i>AT3G28270</i> | 1  | 543  | AATTTCTGgttaagttttctctctcaactctcttt    |
| A65    | NM_115438 | <i>SBPASE</i>    | 2  | 92   | AAAGCTTGgttgagtaacacaagaactcaactttatt  |
| A66    | NM_115577 | <i>AT3G57170</i> | 4  | 87   | ATGAAATGgttgagtagtttccaaaatgctctctttg  |
| A67    | NM_117755 | <i>AT4G16560</i> | 12 | 255  | TGCTCCTGgttaagctctctatccatttaactttgat  |
| A68    | NM_119341 | <i>AT4G31900</i> | 3  | 210  | GCTTGCCGgttaagtgattcaagctgtctctttgtt   |
| A69    | NM_120931 | <i>AT5G08460</i> | 4  | 121  | TAATTACGgttaagtagtctcaactatccctgttttac |
| A70    | NM_121236 | <i>AT5G11980</i> | 7  | 92   | AGTGCATGgttgagttctctgcatctgtgtattcct   |
| A71    | NM_124455 | <i>AT5G50770</i> | 3  | 85   | CGGCTATGgtcaagttactccgaccaagaatctctcta |
| A72    | NM_125539 | <i>MIM</i>       | 22 | 85   | AACTCATGgttgagctgcagatctgttatgttaaag   |
| Search |           | NYAGTRRAGT       | 5  |      |                                        |
| A73    | NM_100395 | <i>AT1G05170</i> | 3  | 88   | GCATTACAgtaaagtttcaactctttgtctgtcattt  |
| A74    | NM_101251 | <i>AT1G13830</i> | 2  | 86   | ACCTTCCAgtaaagtaataactcctaaaagctaaaa   |
| A75    | NM_101918 | <i>AT1G20680</i> | 5  | 1458 | AACATCCAgtagagttacaagaacaattgcgagcat   |
| A76    | NM_114647 | <i>ATATH7</i>    | 16 | 92   | ACTCACCAgtagagctcttaagcatctatctcttt    |
| A77    | NM_124406 | <i>AT5G50270</i> | 1  | 148  | ATCATCCAgtgaagttcctgagtttattactcagtc   |
| Search |           | NYAGTYAGT        | 7  |      |                                        |
| A78    | NM_100877 | <i>AT1G10030</i> | 1  | 1168 | GACCACCAgttcagttctcccttttaetctatttt    |
| A79    | NM_103923 | <i>AT1G50400</i> | 1  | 285  | AGCTACCAgttcagtataccctctctctactgctt    |
| A80    | NM_129435 | <i>AT2G38780</i> | 1  | 209  | TAAACCCAgttcagtaaaaaatcatctttgacacaaa  |
| A81    | NM_129497 | <i>AT2G39400</i> | 2  | 98   | CATGAACAgttcagtcagatattaaaaattactaac   |
| A82    | NM_112890 | <i>TOM40</i>     | 1  | 498  | AGCTCTCAgttcagtatacctaaaccttttccgat    |
| A83    | NM_118130 | <i>AT4G20110</i> | 7  | 92   | CTTGCTCAgtttagtgattctctgtcataagccaaac  |
| A84    | NM_119538 | <i>AT4G33800</i> | 3  | 115  | AATAACCAgttcagtaattttttattattctgtga    |
| Search |           | NYAGTYRBGT       | 4  |      |                                        |
| A85    | NM_180015 | <i>AT2G41160</i> | 1  | 87   | CGGTTTCAgttacgtatcgaaattgaataaccatttc  |
| A86    | NM_180271 | <i>AT3G17265</i> | 1  | 86   | CAAGAACAgttatgttttaggatatggaacacaacaa  |
| A87    | NM_118752 | <i>AT4G26190</i> | 3  | 71   | TCTTCTTAgttagtgctctatacatagaaagttta    |
| A88    | NM_123512 | <i>GLAI</i>      | 5  | 95   | GTGCCCCAgttaggtggttttatgttttgcctatct   |
| Search |           | NYAGTYRAHT       | 9  |      |                                        |
| A89    | NM_100544 | <i>NIH</i>       | 11 | 105  | CTTATCCAgttaattcctctcttttatgtctctct    |
| A90    | NM_104690 | <i>AT1G59980</i> | 7  | 91   | TTAATTCAgttaattatttctctacctcttaageta   |
| A91    | NM_105399 | <i>AT1G67310</i> | 1  | 141  | AGTCCATAgtcaaaattatacctctttttgtctcta   |
| A92    | NM_106238 | <i>AT1G75880</i> | 2  | 87   | TAGCGGTAgttaatttgagtaactatgcataatttaa  |
| A93    | NM_179823 | <i>HVT1</i>      | 11 | 84   | CTTATCCAgttaattctctttctctctatactcg     |
| A94    | NM_179859 | <i>ATCSLB03</i>  | 5  | 94   | TACAATCAgttaattctctctctcttattttttt     |
| A95    | NM_114201 | <i>AT3G43330</i> | 7  | 61   | AAGAATCAgttaactacatgtttctactagctttgc   |
| A96    | NM_119567 | <i>AT4G34060</i> | 2  | 41   | TGTAATCAgttaactcattttatttttaactttt     |
| A97    | NM_122884 | <i>AT5G34930</i> | 1  | 117  | CAGAGACAgttgaatccatcatcatcatcatcagtc   |
| Search |           | NYAGTYRAGV       | 18 |      |                                        |
| A98    | NM_100923 | <i>AT1G10490</i> | 20 | 94   | AAATACCAgttgagaatccctcttccctctctctcg   |
| A99    | NM_127387 | <i>AT2G18290</i> | 1  | 101  | TATTGGCAgttgagaaacgaaaaaaaactaaagctc   |
| A100   | NM_127544 | <i>ATHXK2</i>    | 3  | 105  | ACGATACAgttgagctgttctctctctctctctcc    |
| A101   | NM_128895 | <i>AT2G33350</i> | 1  | 239  | TTAACATAgttaagccagacaaaattacttaagtata  |
| A102   | NM_179985 | <i>AT2G39410</i> | 3  | 194  | CATGAATAgttgagatcaaccacttcacaaattctat  |

|      |           |                  |    |     |                                        |
|------|-----------|------------------|----|-----|----------------------------------------|
| A103 | NM_129500 | <i>AT2G39420</i> | 3  | 97  | CATGAACAgttgagatactcagccaactcatgatt    |
| A104 | NM_113609 | <i>AT3G26950</i> | 6  | 92  | CAGTCTCAgtaagatcgttttttagtttcctcaacac  |
| A105 | NM_117800 | <i>AT4G16970</i> | 11 | 89  | CCTGAACAgtaagatcgaactgaaatgagtagacacat |
| A106 | NM_119057 | <i>ATHXK1</i>    | 3  | 86  | AAGAAGCAgtaagctcgatttctcaactattca      |
| A107 | NM_119554 | <i>AT4G33940</i> | 3  | 210 | TCTTTGCAgtaagaacatctaccctgaaattacat    |
| A108 | NM_120026 | <i>AT4G38650</i> | 3  | 87  | CTTCTCCAgttaagcatttcattctctctagaa      |
| A109 | NM_120494 | <i>AT5G04120</i> | 3  | 108 | CTGTTGCAgtaagatccaatcccttaactccctgt    |
| A110 | NM_120572 | <i>AT5G04900</i> | 12 | 114 | TATTCTCAgttaagacgattaatagctcgtcgtagaag |
| A111 | NM_122051 | <i>AT5G20440</i> | 3  | 93  | CATGAACAgtaagacacacattatcatccatagtt    |
| A112 | NM_122301 | <i>AT5G23960</i> | 5  | 78  | AGAAATCAgttaagacaaaagaatcaacttaagcat   |
| A113 | NM_148058 | <i>AT5G38386</i> | 1  | 105 | AGAAACTAgtaagctcattatctgattgatattc     |
| A114 | NM_125499 | <i>AT5G61060</i> | 8  | 217 | CTACTCCAgttgagaccctctttttgtaccattt     |
| A115 | NM_125736 | <i>AT5G63410</i> | 5  | 192 | ATAACACAgttaagctcgtttctttaatgtctgtttc  |

**Supplementary Table 2 Complete list of predicted atypical 5' ss in five species.** Each atypical 5' ss is labeled with the initial of the species where it was found, and a number. For each 5' ss, we provide the accession number, the gene name, the intron number and length, and a sequence that includes the atypical 5' ss (8 nucleotides in the exon, 30 in the intron). The query sequence used to obtain each hit is also shown. For the human and mouse collections, the orthologous 5' ss in the other species is indicated, whether it is conserved or not. Cases for which the orthologous intron or gene could not be found are also indicated.
